# Supplementary material
Source: PubMed Central journal article supplement (PMC2099465)

# Supplemental Figure 1

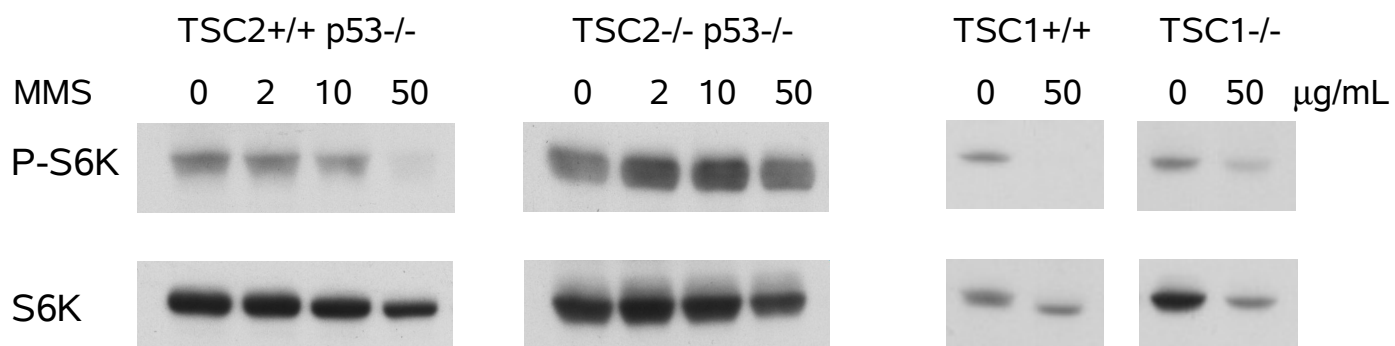

# Supplemental Figure 2

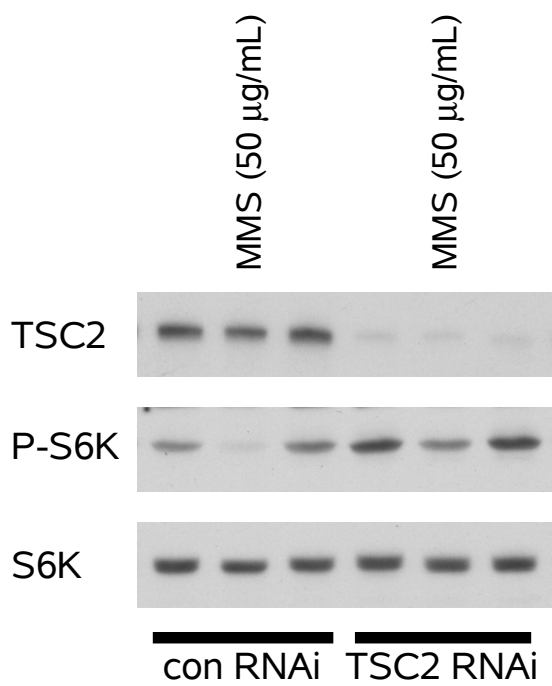

# Supplemental Figure 3

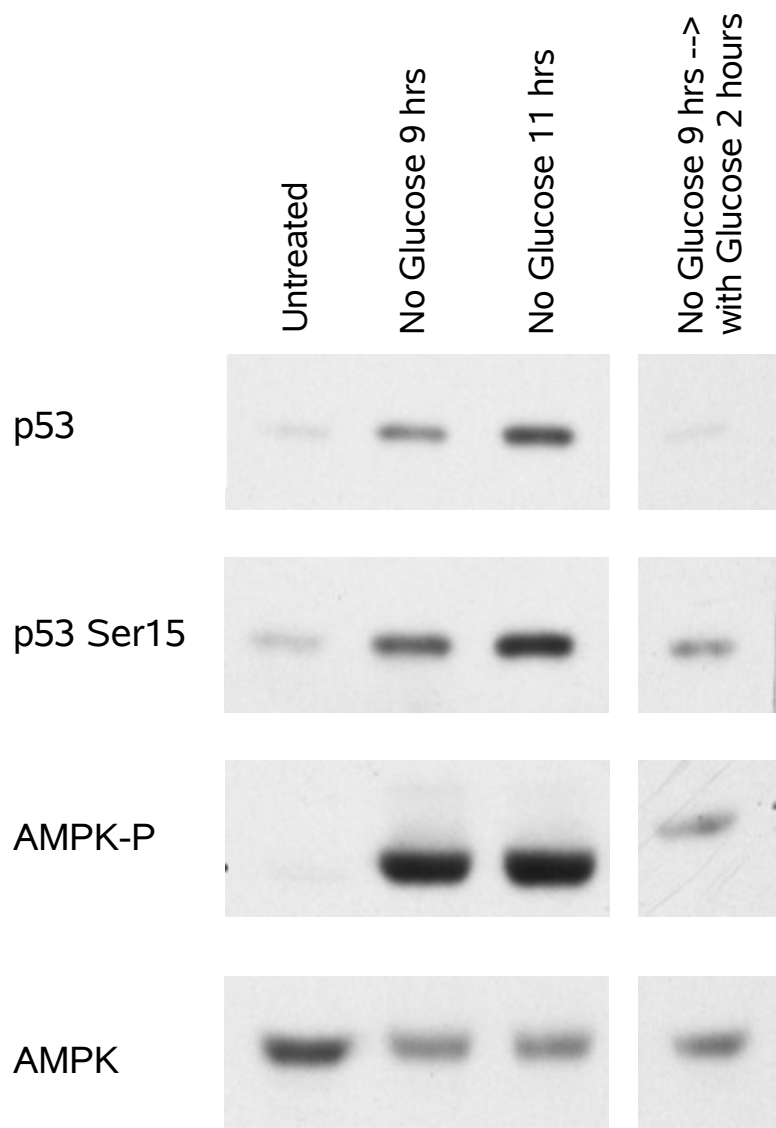

# Supplemental Figure 4

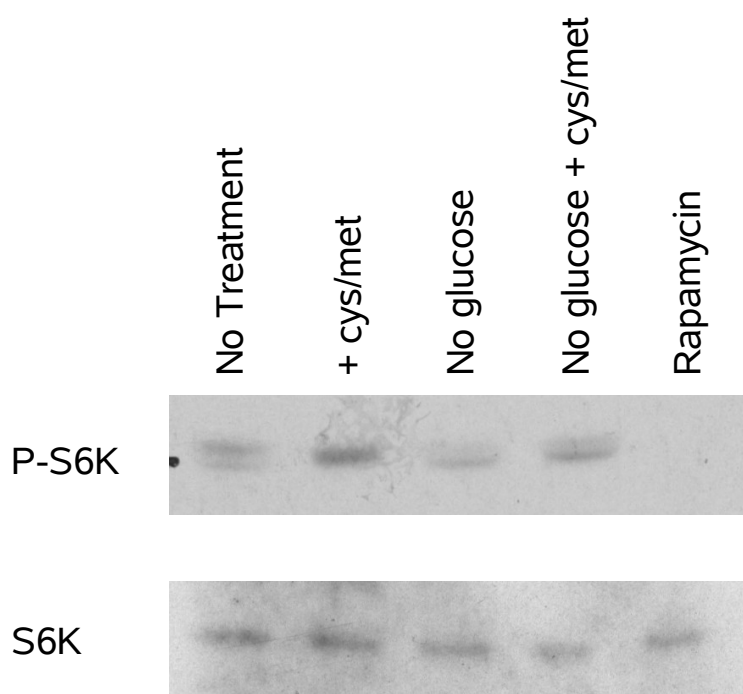

# Supplemental Figure 5

Actin mRNA (untreated)

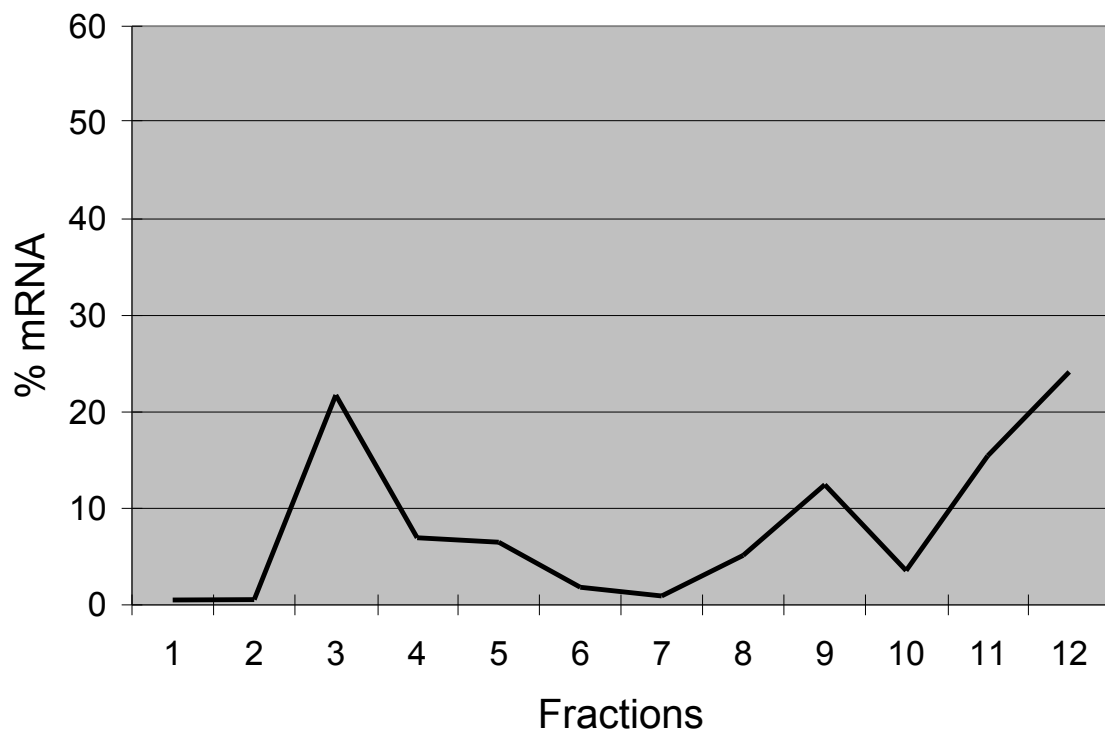

Actin mRNA (rapamycin)

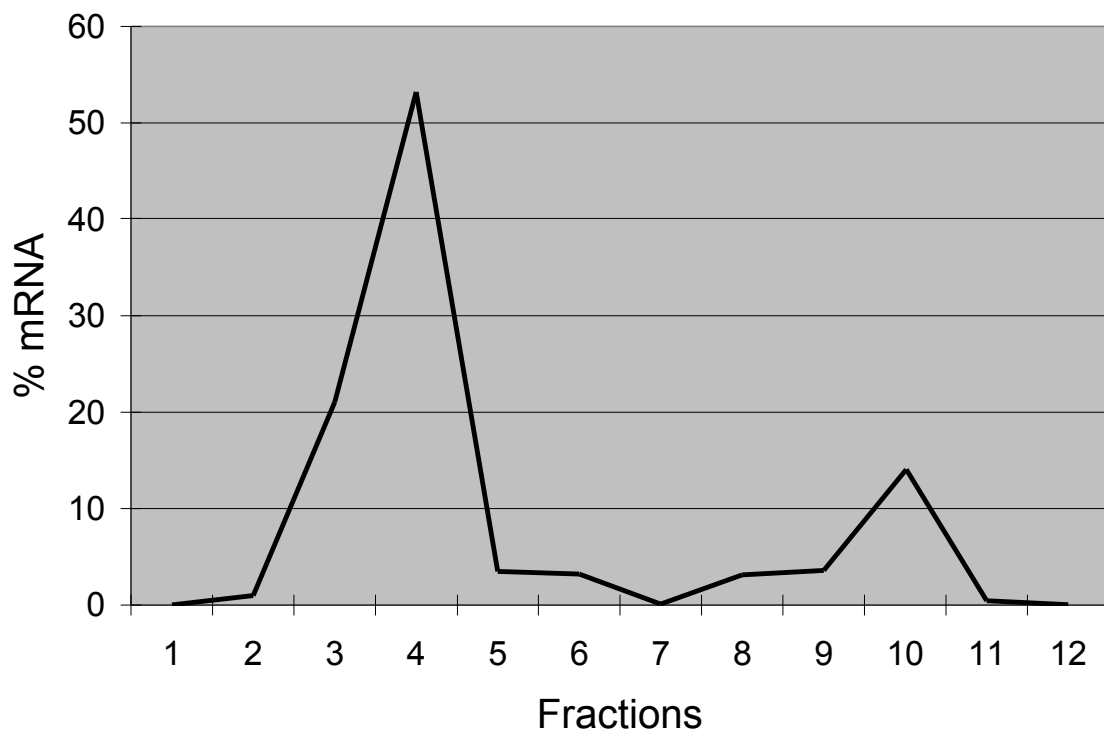

# Supplemental Figure 6

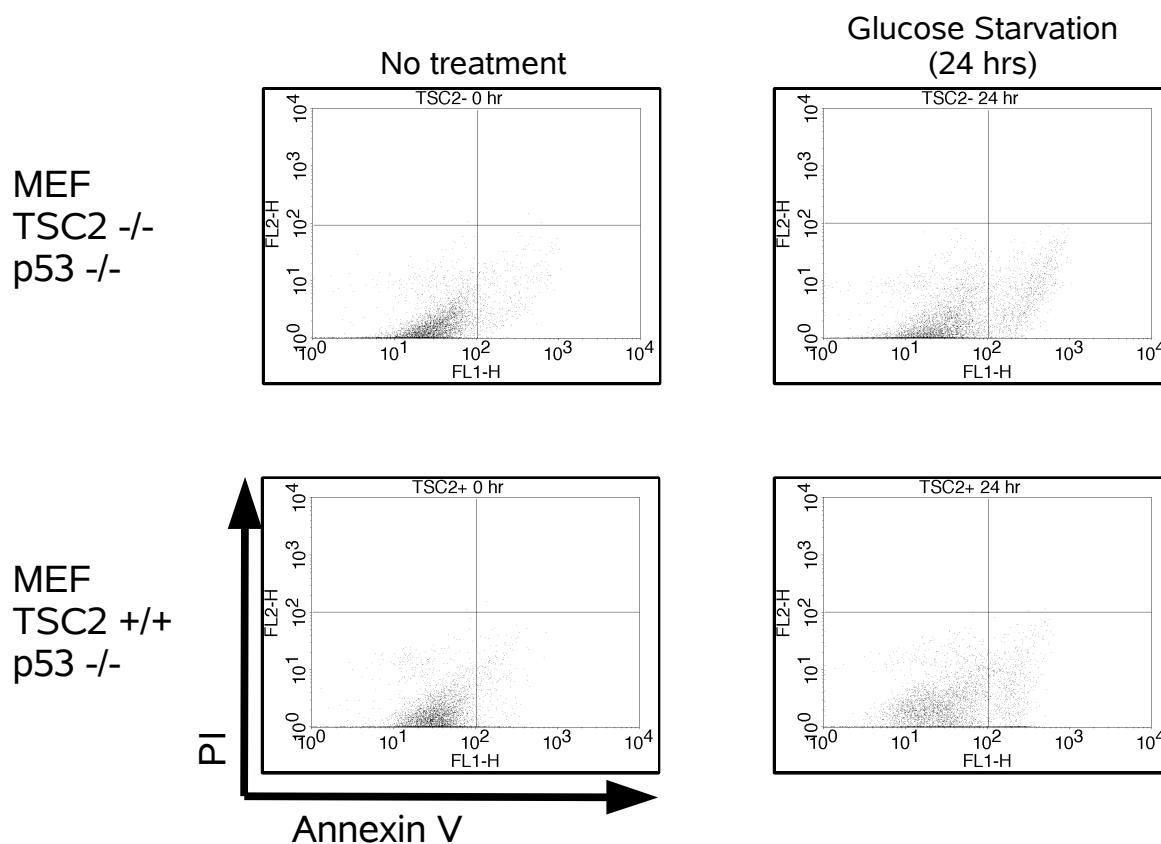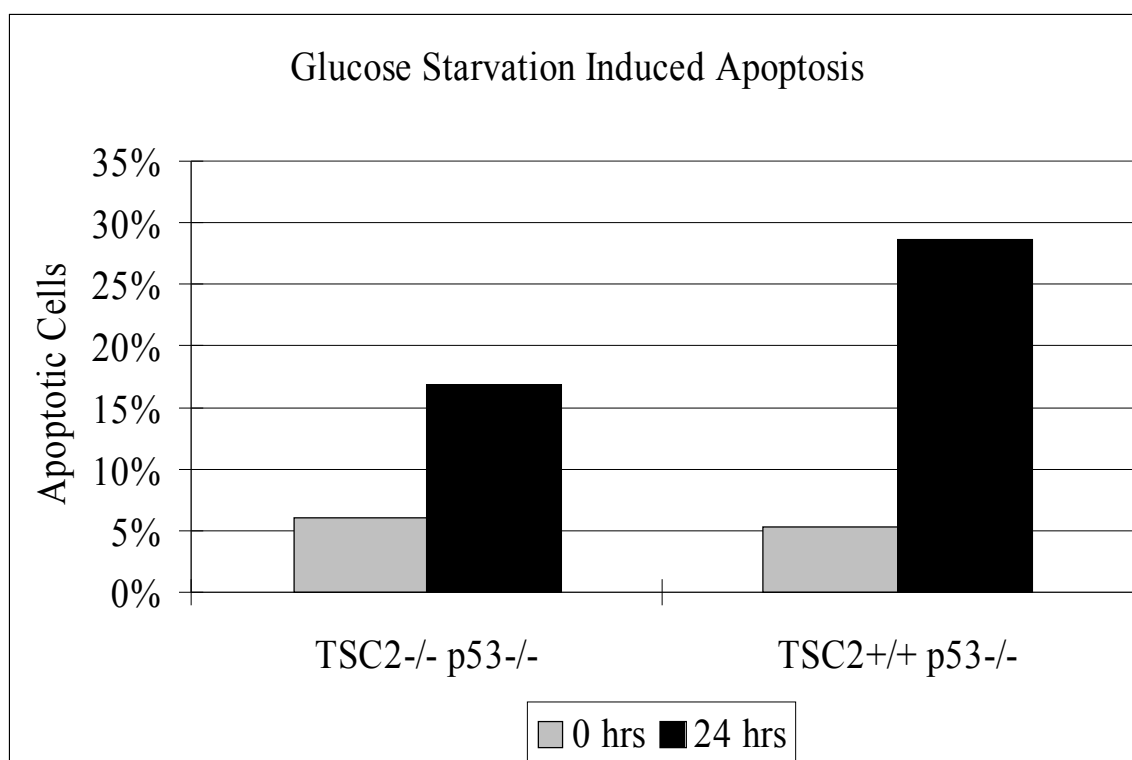

Supplement: 7601900s1.pdf [file 7601900s1.pdf]
